# Supplementary material for: The natural retinoprotectant chrysophanol attenuated photoreceptor cell apoptosis in an N-methyl-N-nitrosourea-induced mouse model of retinal degenaration
Source: PubMed Central journal article supplement (PMC5253624; doi:10.1038/srep41086), 2017-01-23
Supplement: srep41086-s1.pdf [file srep41086-s1.pdf]

## Supplementary Information

### **The natural retinoprotectant chrysophanol attenuated photoreceptor cell apoptosis in an *N*-methyl-*N*-nitrosourea-induced mouse model of retinal degeneration**

Fan-Li Lin<sup>1</sup>, Cheng-Hui Lin<sup>2</sup>, Jau-Der Ho<sup>3</sup>, Jing-Lun Yen<sup>1</sup>, Hung-Ming Chang<sup>4</sup>, George C.Y. Chiou<sup>5</sup>, Yu-Wen Cheng<sup>2,†</sup>, George Hsiao<sup>1,\*,†</sup>

<sup>1</sup>Graduate Institute of Medical Sciences and Department of Pharmacology, School of Medicine, College of Medicine, Taipei Medical University, Taipei, Taiwan; <sup>2</sup>School of Pharmacy, College of Pharmacy, Taipei Medical University, Taipei, Taiwan; <sup>3</sup>Department of Ophthalmology, Taipei Medical University Hospital, Taipei, Taiwan; <sup>4</sup>Department of Anatomy, School of Medicine, College of Medicine, Taipei Medical University, Taipei, Taiwan; <sup>5</sup>Department of Neuroscience and Experimental Therapeutics and Institute of Ocular Pharmacology, College of Medicine, Texas A&M Health Science Center, College Station, TX, USA. \*Corresponding author. †

The authors contributed equally to this work.

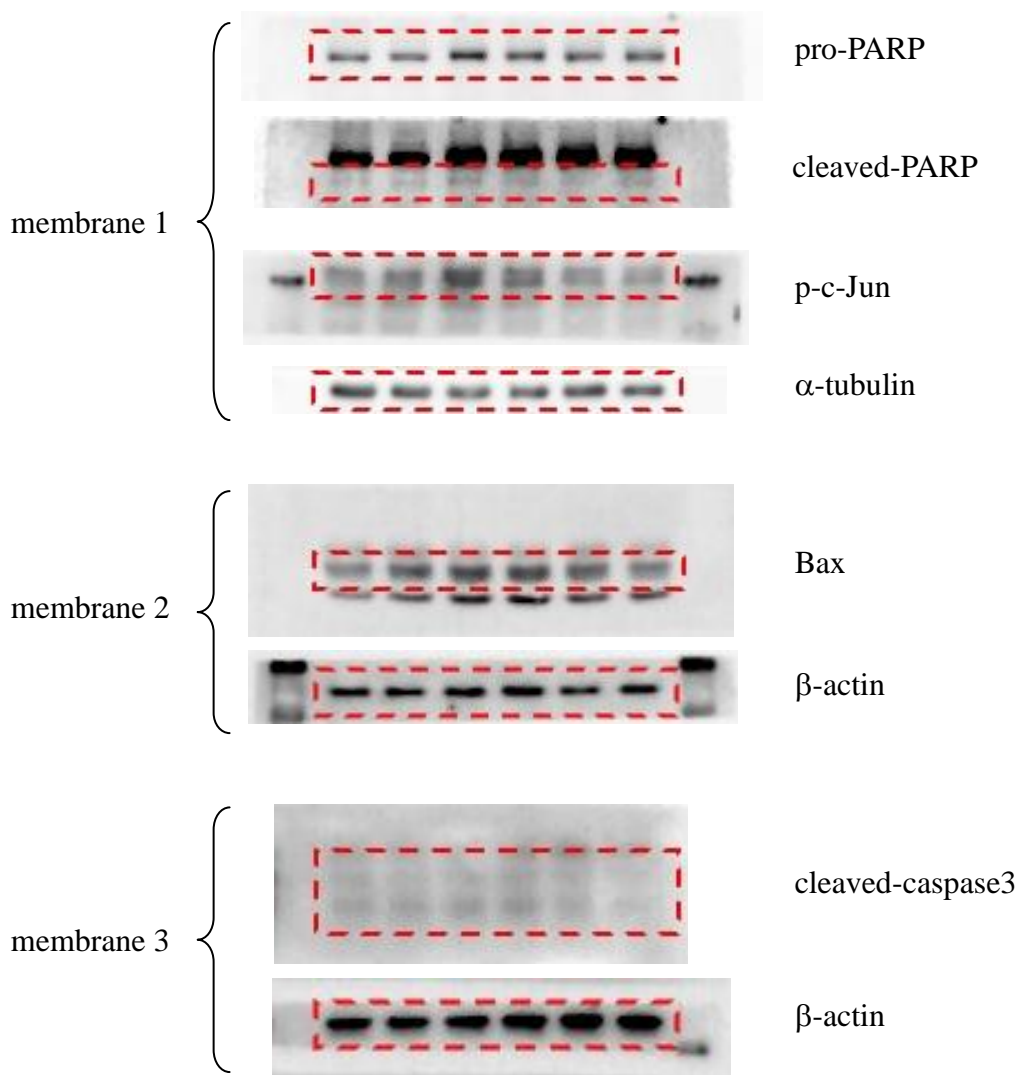

**Supplementary Figure S1.** Full-length western blot images of Figure 6.

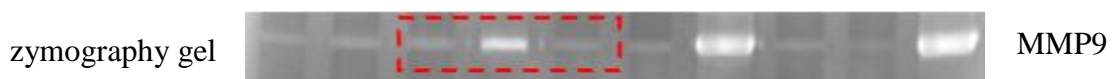

**Supplementary Figure S2.** Full-length zymography images of Figure 7.

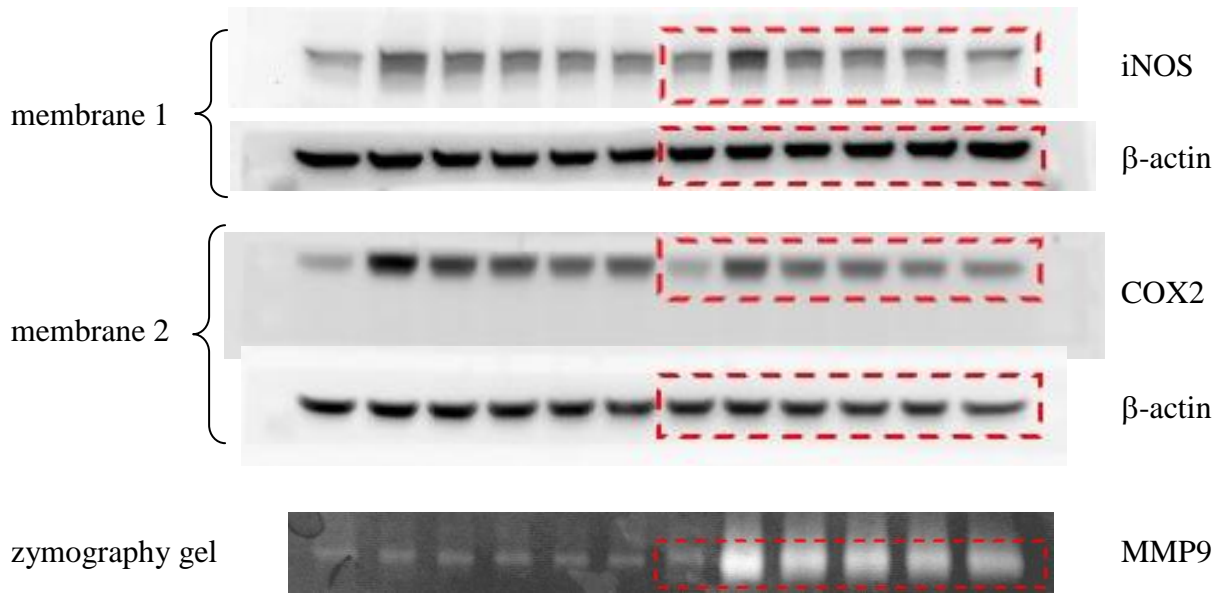

**Supplementary Figure S3.** Full-length western blot and zymography images of Figure 8.
